# Supplementary material
Source: PubMed Central journal article supplement (PMC3269191)

**A**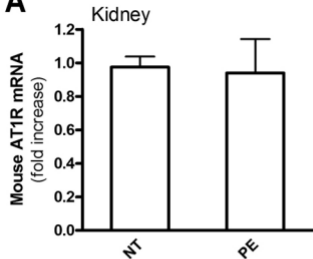**B**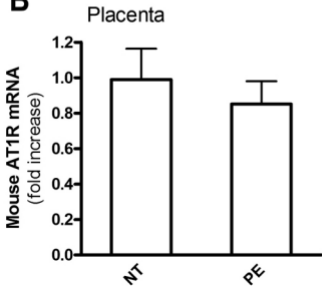

Supplement: NIHMS326837-supplement-Figure_1A_and_1B.pdf [file NIHMS326837-supplement-Figure_1A_and_1B.pdf]
